# Supplementary material for: γ-Fe2O3 nanoparticles encapsulated in polypyrrole for quasi-solid-state lithium batteries
Source: Royal Society of Chemistry journal article supplement (doi:10.1039/c3ta14192f), 2014-01-01
Supplement: c3ta14192f.pdf [file c3ta14192f.pdf]

Electronic Supplementary Information

**$\gamma$ -Fe<sub>2</sub>O<sub>3</sub> nanoparticles encapsulated in polypyrrole for solid-state lithium batteries**

Jae-Kwang Kim,<sup>\*a,b</sup> Luis Aguilera,<sup>b</sup> Fausto Croce,<sup>c</sup> Jou-Hyeon Ahn<sup>\*d</sup>

<sup>a</sup> *Interdisciplinary School of Green Energy, Ulsan National Institute of Science and Technology (UNIST), 689-798 Ulsan, Korea*

<sup>b</sup> *Department of Applied Physics, Chalmers University of Technology, 412 96 Göteborg, Sweden Fax: +46 31 772 2090; Tel: +46 31 772 33 52; E-mail: jaekwang@chalmers.se*

<sup>c</sup> *Dipartimento di Farmacia, Università “d’Annunzio” Chieti-Pescara, Via dei Vestini 31, 66100 Chieti, Italy*

<sup>d</sup> *Department of Chemical & Biological Engineering and Research Institute for Green Energy Convergence Technology, Gyeongsang National University, 900, Gajwa-dong, Jinju 660-701, Korea*

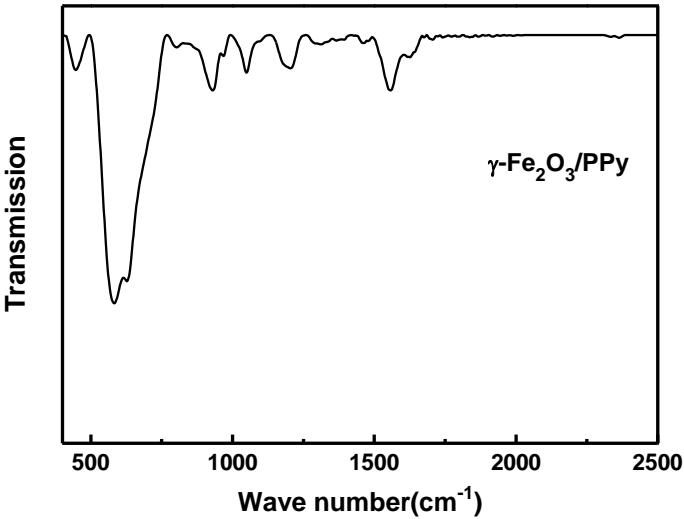

**Figure S1.** FT-IR pattern of  $\gamma\text{-Fe}_2\text{O}_3\text{-PPy}$  core-shell.

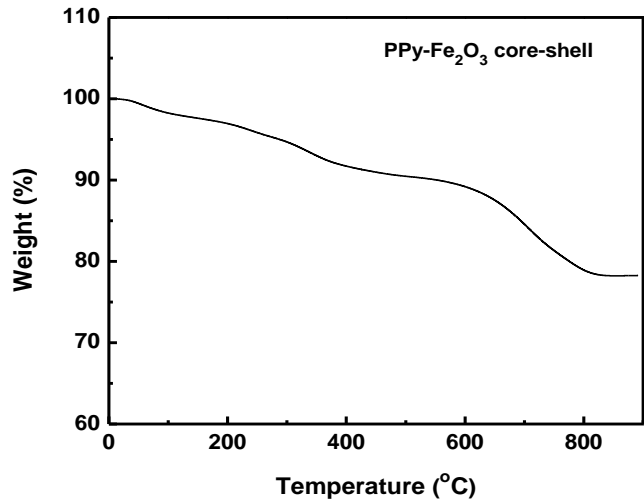

**Figure S2.** TGA curve of  $\gamma\text{-Fe}_2\text{O}_3\text{-PPy}$  core-shell.

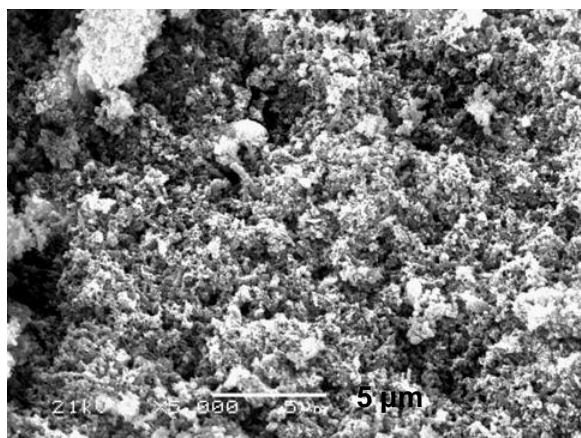

**Figure S3.** SEM image of  $\gamma$ -Fe<sub>2</sub>O<sub>3</sub>-PPy core-shell.

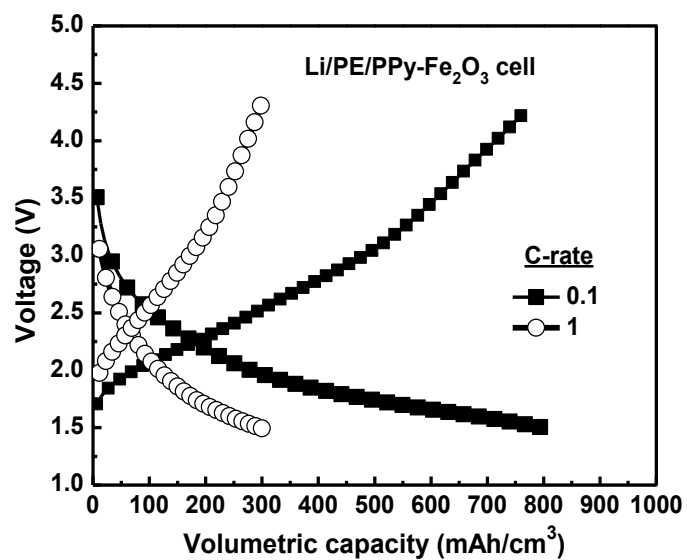

**Figure S4.** Initial charge-discharge volumetric capacities of Li/GPE/PPy-Fe<sub>2</sub>O<sub>3</sub> cells at different current densities (0.1 and 1 C-rate, RT).

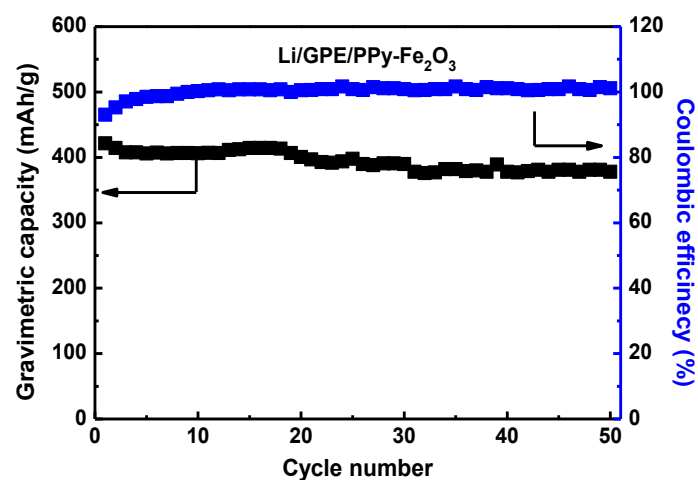

**Figure S5.** Cycle performance and coulombic efficiency of Li/GPE/PPy-Fe<sub>2</sub>O<sub>3</sub> cells at 0.1C-rate (Room temperature).

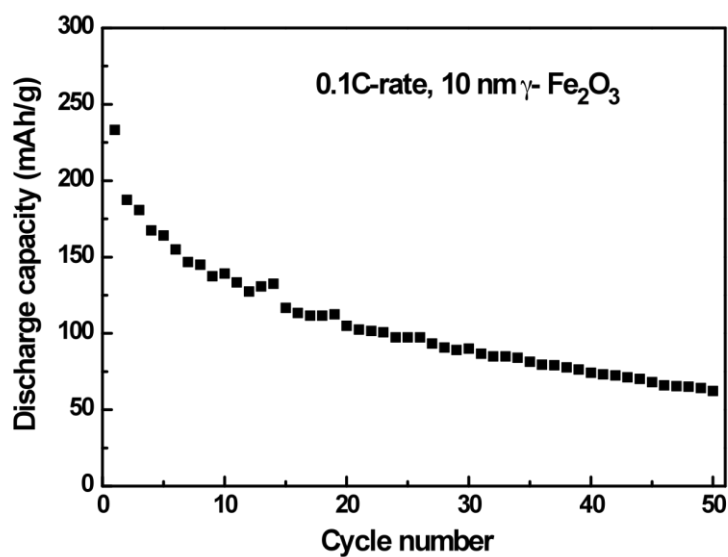

**Figure S6.** Cycle performance of nano sized  $\gamma$ -Fe<sub>2</sub>O<sub>3</sub> cell at 0.1C-rate (Room temperature).

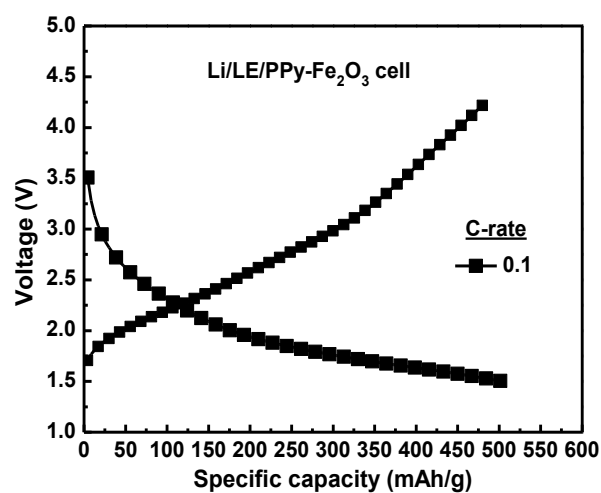

**Figure S7.** Initial charge-discharge capacity of Li /PPy-Fe<sub>2</sub>O<sub>3</sub> cells with liquid electrolyte (0.1 C-rate, RT).
